# Supplementary material
Source: PubMed Central journal article supplement (PMC7615909)
Supplement: EMS195460-supplement-Supplemental_files.pdf [file EMS195460-supplement-Supplemental_files.pdf]

## Supplementary Materials for

### **Persistently activated, proliferative memory autoreactive B cells promote inflammation in rheumatoid arthritis**

Hendy Kristyanto, Nienke J. Blomberg, Linda M. Slot, Ellen I. H. van der Voort, Priscilla F. Kerkman, Aleida Bakker, Leonie E. Burgers, Robin M. ten Brinck, Annette H. M. van der Helm-van Mil, Hergen Spits, Dominique L. Baeten, Tom W. J. Huizinga, René E. M. Toes, Hans U. Scherer\*,

\*Corresponding author. Email: h.u.scherer@lumc.nl

Published 18 November 2020, *Sci. Transl. Med.* **12**, eaaz5327 (2020)

DOI: 10.1126/scitranslmed.aaz5327

#### **This PDF file includes:**

- Fig. S1. Subsets of ACPA-positive B cells in synovial fluid of inflamed joints from patients with RA.
- Fig. S2. Histogram plots depicting the positivity for CD80, CD86, or Ki-67 in ACPA-positive (ACPA<sup>+</sup>), TT-specific (TT<sup>+</sup>), and bulk (ACPA<sup>-</sup>) MBC populations.
- Fig. S3. Relative gene expression of B cell phenotypic markers in ACPA-positive and non-citrulline-reactive MBCs.
- Fig. S4. Correlation analysis between systemic inflammation and the characteristics of ACPA-positive MBCs.
- Fig. S5. Characteristics of ACPA-positive B cells in individuals with ACPA<sup>+</sup> arthralgia.
- Fig. S6. Phenotype of ACPA-positive B cells in different disease phases compared to TT-specific B cells in the steady state and upon recent vaccination in patients with RA.
- Fig. S7. Correlation between the proportion of TT-specific MBCs positive for CD80 or CD86, and abundance of CD19 or HLA-DR and time after TT vaccination in untreated patients with RA.
- Fig. S8. Cytokine secretion by ACPA-positive MBCs.
- Fig. S9. Abundance of IgG on CD20<sup>+</sup>CD27<sup>+</sup> ACPA-positive and ACPA-negative B cells from RA patient peripheral blood.
- Fig. S10. Production of IL-8 by TT-specific and ACPA-positive, immortalized B cell clones triggered by various stimulants.
- Fig. S11. Production of IL-8 by B cells from healthy individuals under different stimulation conditions and at different time points after stimulation.
- Data file S1. Subject-level data for experiments with  $n < 20$  donors or replicates.

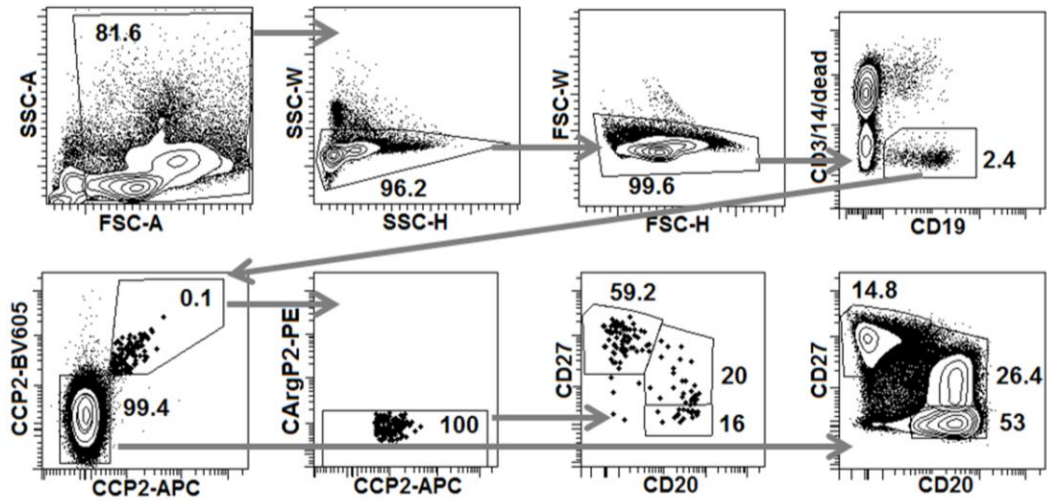

**Fig. S1. Subsets of ACPA-positive B cells in synovial fluid of inflamed joints from patients with RA.** Gating strategy for the identification and subset characterization of ACPA-positive B cells. ACPA-positive B cells were identified using differentially labelled CCP2 and CArgP2 streptavidin tetramers. B cell subsets were delineated based on the differential abundance of CD20 and CD27.

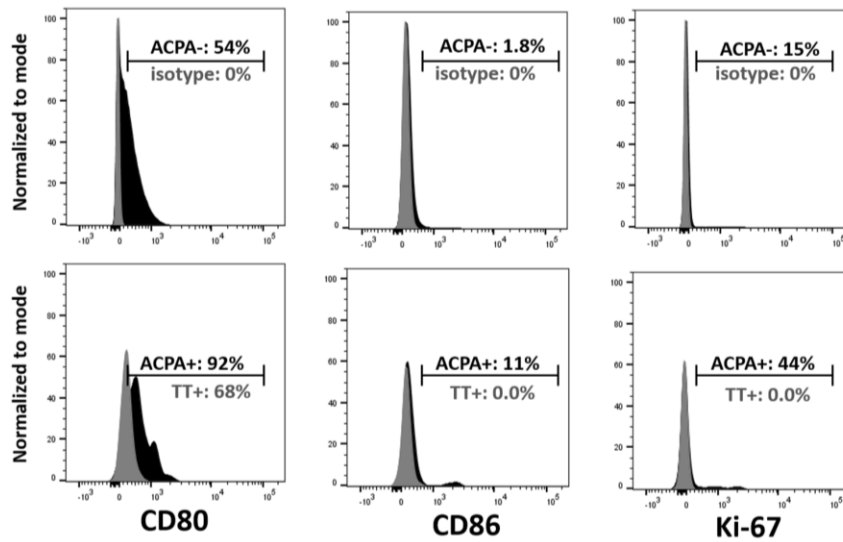

**Fig. S2. Histogram plots depicting the positivity for CD80, CD86, or Ki-67 in ACPA-positive (ACPA<sup>+</sup>), TT-specific (TT<sup>+</sup>), and bulk (ACPA<sup>-</sup>) MBC populations.** Data depict results from one representative donor (for combined data see Figure 2B).

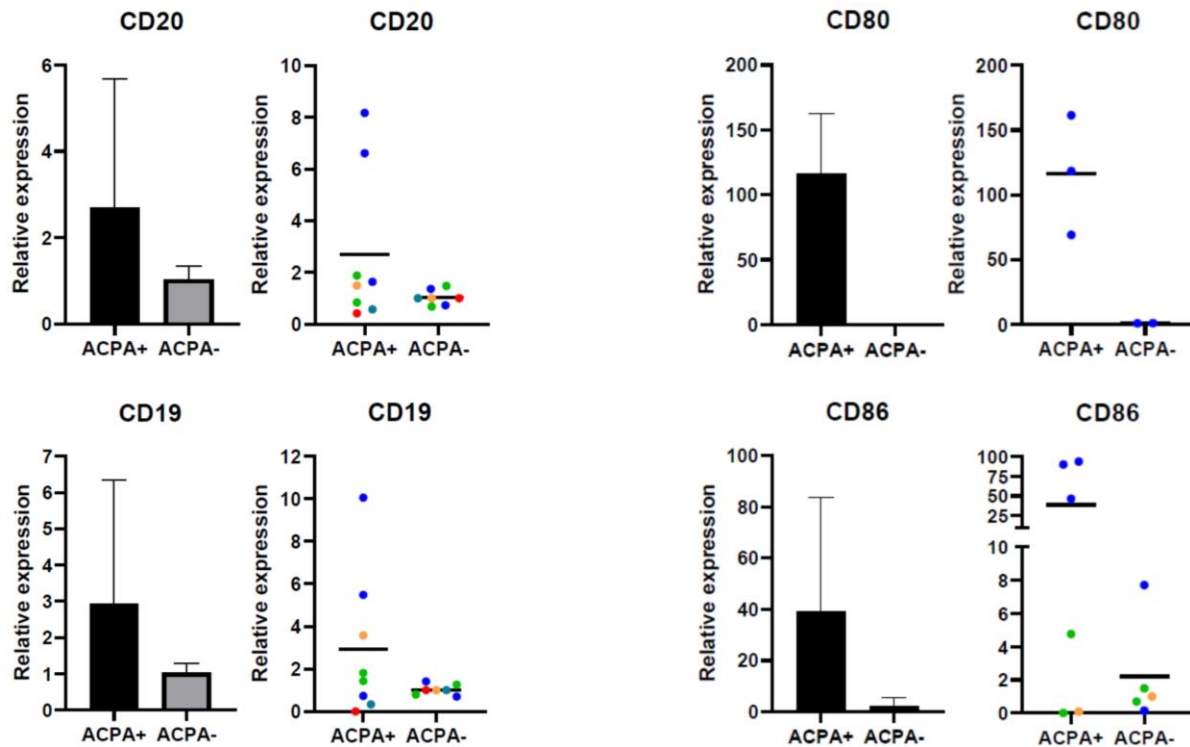

**Fig. S3. Relative gene expression of B cell phenotypic markers in ACPA-positive and non-citrulline-reactive MBCs.** Transcript abundance was determined by RT-PCR using mRNA derived from ACPA-positive (ACPA+) B cells and non-citrulline reactive (ACPA-) B cells. Each dot corresponds to a pool of 8 – 30 cells, colors represent individual patients (n = 5). Expression is presented relative to the expression in the ACPA-samples and corrected for the expression of beta-2 microglobulin (B2M) within donors. ACPA+ cells [CD19+CD20+CD27+ (CCP2+ or CArgP2+)] and ACPA- cells [CD19+CD20+CD27+(CCP2- or CArgP2-)] were obtained by FACS from patients with ACPA-positive RA.

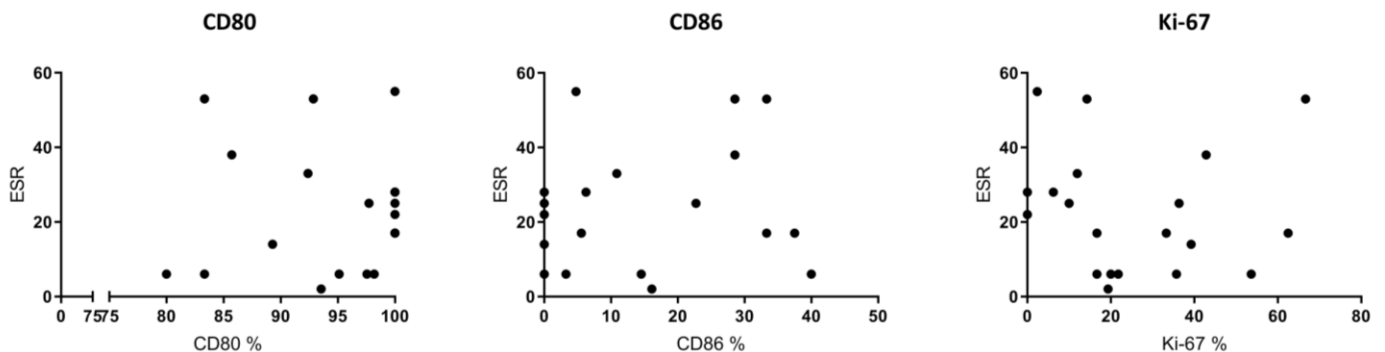

**Fig. S4. Correlation analysis between systemic inflammation and the characteristics of ACPA-positive MBCs.** Data are presented as percentage of ACPA-positive MBCs that are also positive for the indicated marker in relation to the erythrocyte sedimentation rate (ESR) (n = 20).

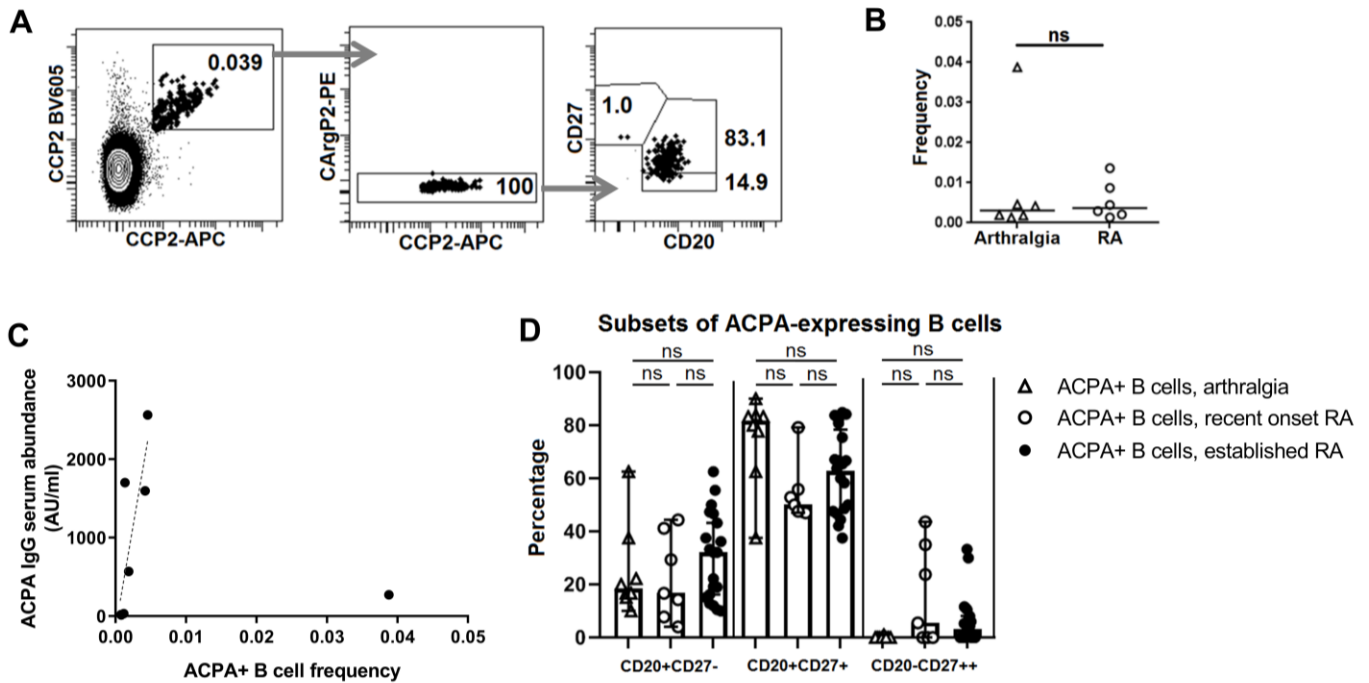

**Fig. S5. Characteristics of ACPA-positive B cells in individuals with ACPA<sup>+</sup> arthralgia.** (A) ACPA-positive B cells in individuals with arthralgia in PBMCs. (B) Frequency of ACPA-positive B cells in PBMCs from individuals with arthralgia compared to the frequency in RA patients with matched ACPA IgG plasma abundance (available for n = 6). (C) Correlation between the frequency of ACPA-positive B cells in PBMCs from individuals with arthralgia and serum ACPA IgG abundance (n = 8). The dotted line depicts the correlation if the one outlying donor with a high frequency of ACPA-positive B cells is removed from the analysis (Pearson R 0.81, P 0.02) (D) B cell subsets identified by the abundance of CD20 and CD27 on ACPA-positive B cells from individuals with arthralgia (n = 8), patients with early onset, untreated RA (n = 7), and patients with established, treated RA (n = 20). ns, non-significant P > 0.05. Two-tailed Mann-Whitney test in B; Pearson correlation in C; one-way ANOVA with Dunn's multiple comparison test in D. (n = number of donors)

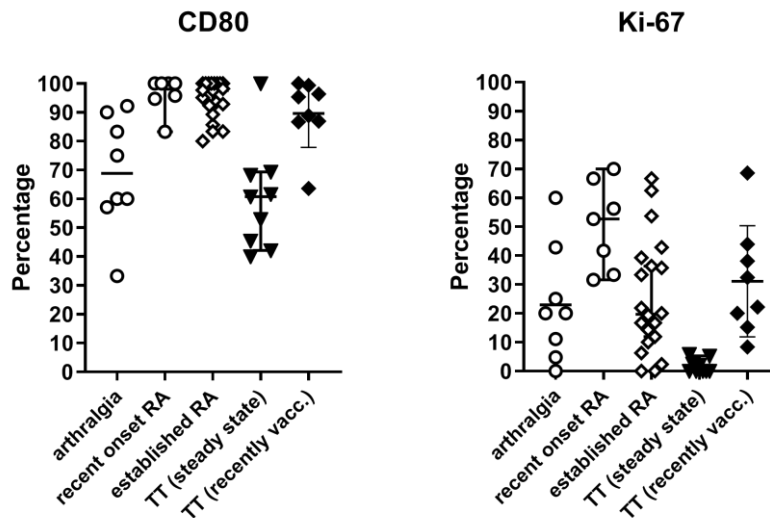

**Fig. S6. Phenotype of ACPA-positive B cells in different disease phases compared to TT-specific B cells in the steady state and upon recent vaccination in patients with RA.** ACPA-positive B cells (open symbols), TT specific B cells (closed symbols). Recently vaccinated (recently vacc.) indicates analysis 28 days after booster injection.

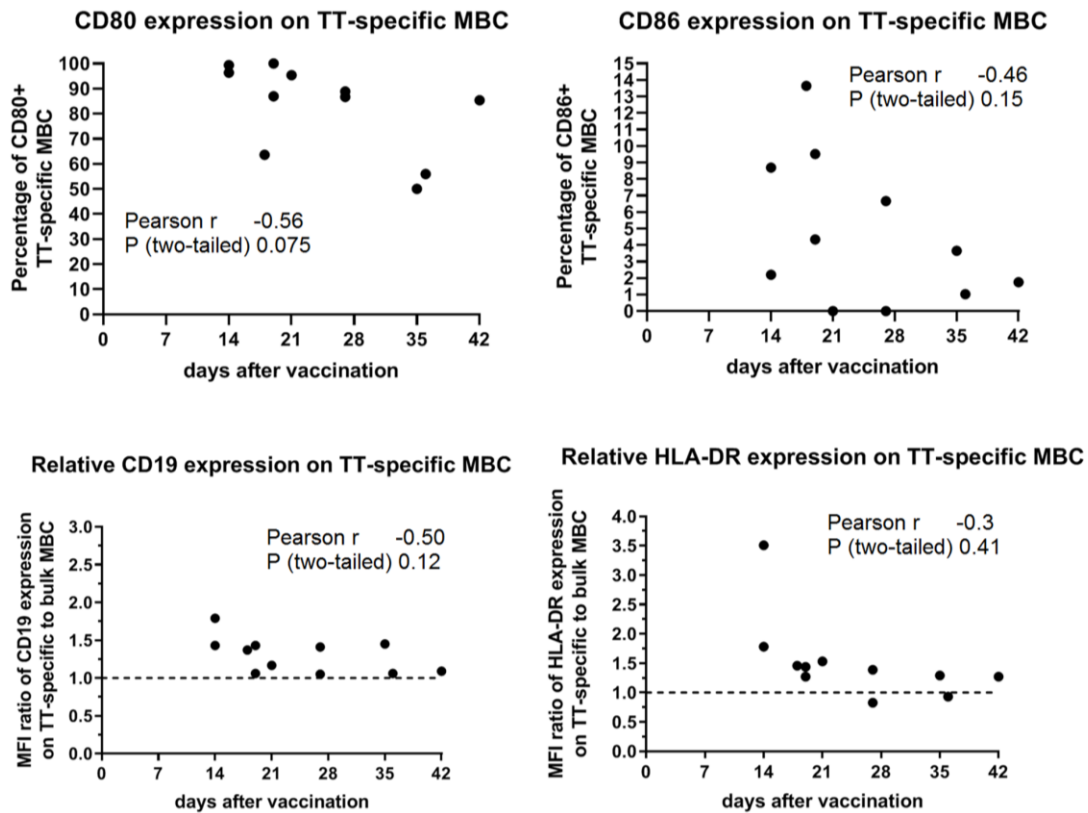

**Fig. S7. Correlation between the proportion of TT-specific MBCs positive for CD80 or CD86, and abundance of CD19 or HLA-DR and time after TT vaccination in untreated patients with RA. (n=11)**

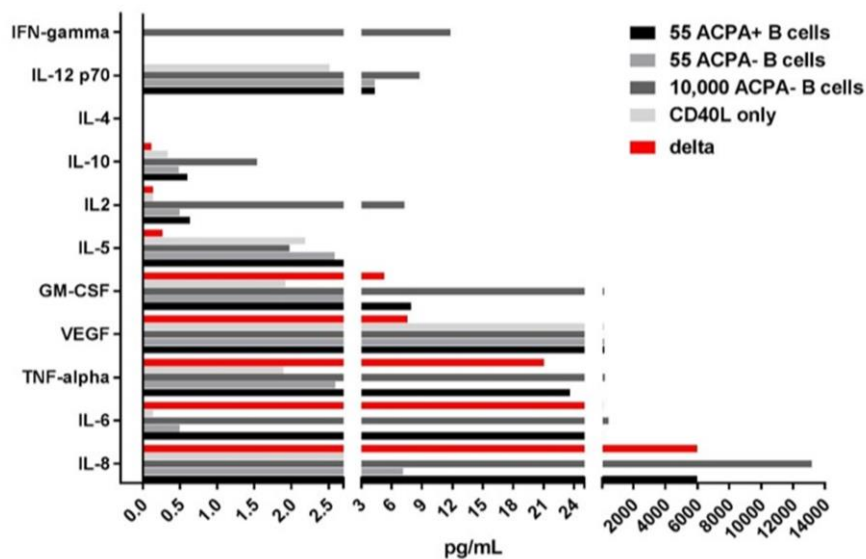

**Fig. S8. Cytokine secretion by ACPA-positive MBCs.** Representative graph of 11 cytokines secreted by sorted, CD20+CD27+ ACPA-positive and ACPA-negative B cells after 7 days of CD40 and BCR stimulation. Cytokines are ranked from bottom to top based on the difference in secretion between ACPA-positive and ACPA-negative B cells (red, delta). As a positive control, 10,000 CD20+CD27+ ACPA-negative B cells were treated with the same stimulants (dark grey). As a negative control, irradiated CD40L-positive cells were treated with anti-IgG/IgM Fab2 fragments in the absence of B cells (light grey).

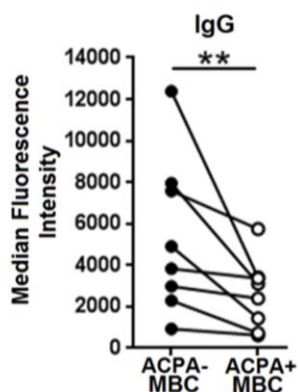

**Fig. S9. Abundance of IgG on CD20<sup>+</sup>CD27<sup>+</sup> ACPA-positive and ACPA-negative B cells from RA patient peripheral blood.** Each dot represents an individual donor (n = 8). Connected dots depict data from individual patient samples. \*\* p ≤ 0.01. Two-tailed Wilcoxon signed rank test.

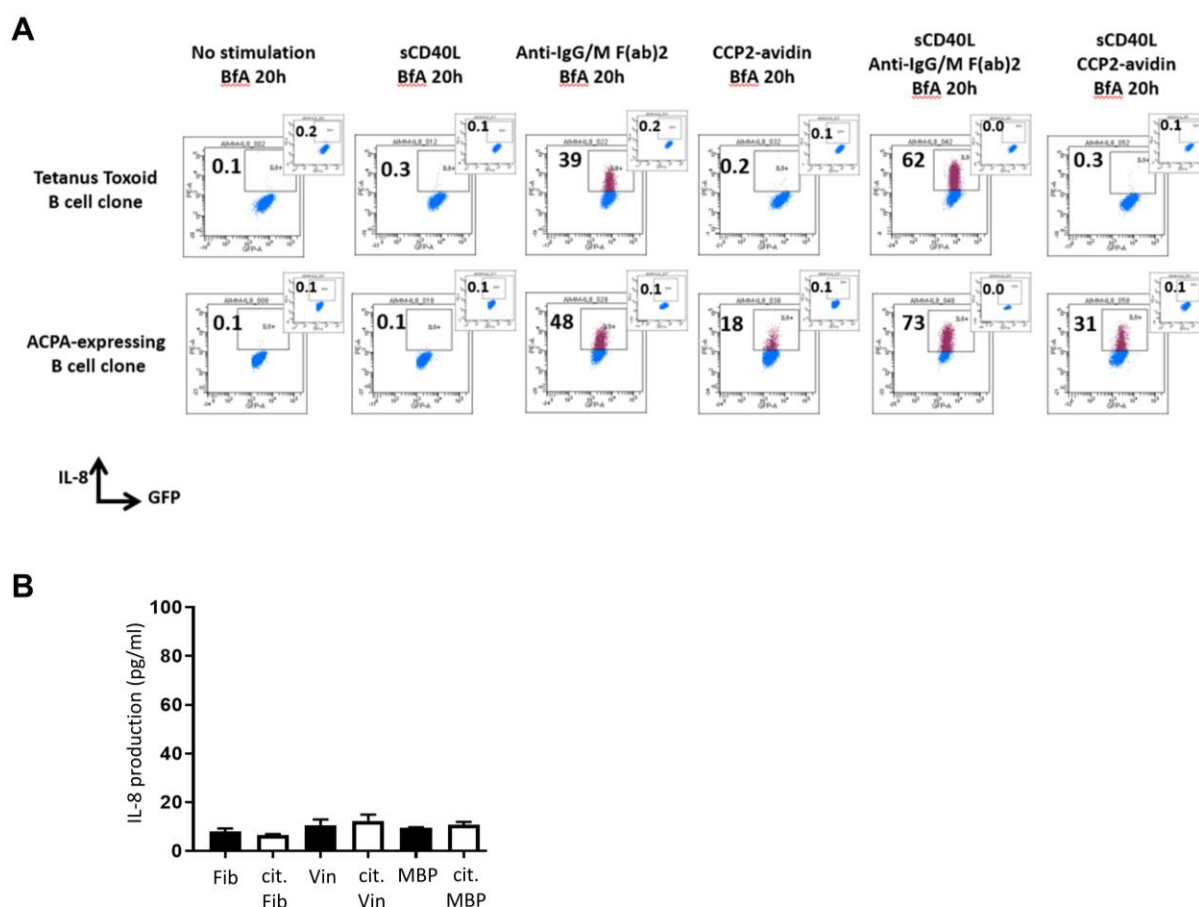

**Fig. S10. Production of IL-8 by TT-specific and ACPA-positive, immortalized B cell clones triggered by various stimulants.** (A) Data obtained by flow cytometry. Transduced cells are visualized by the expression of GFP. Data are representative of 1 of 3 experiments. Large graph shows staining with anti-IL-8 PE; small popout indicates isotype control staining for IL-8. (B) Data obtained by ELISA upon stimulation of the TT-specific B cell clone with different citrullinated proteins or their native variants.

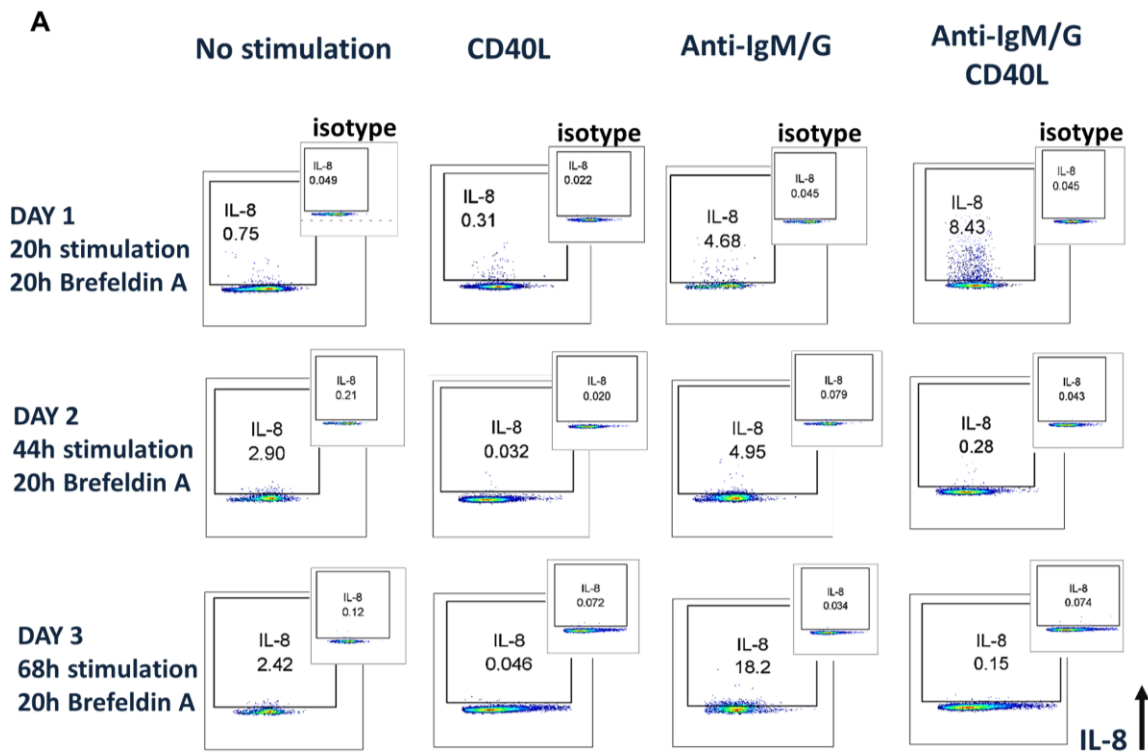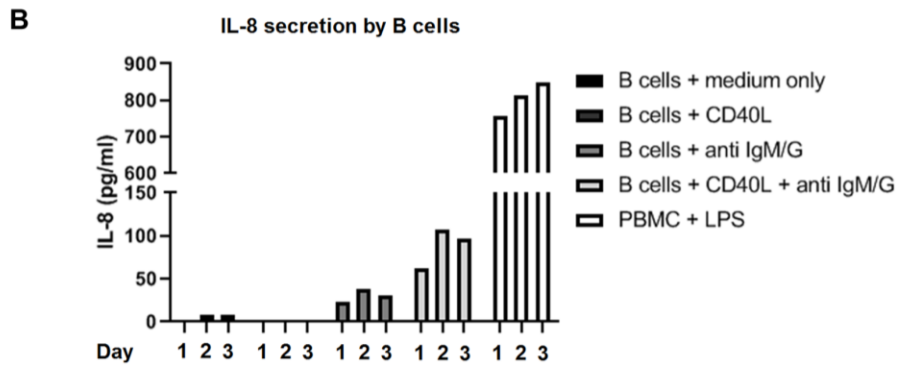

**Fig. S11. Production of IL-8 by B cells from healthy individuals under different stimulation conditions and at different time points after stimulation. (A)** Data obtained by flow cytometry. Data are representative of 1 of 3 experiments. Large graph shows staining with anti-IL-8 PE; small popout indicates isotype control stainings. **(B)** ELISA analysis of IL-8 secretion by the indicated cells stimulated as indicated. Supernatant was collected on day 1, day 2, and day 3 after stimulation. LPS, lipopolysaccharide

**Data file S1. Subject-level data for experiments with  $n < 20$  donors or replicates. Figure 2A.**

| No | Patient code | FSC<br>(ratio to ACPA- MBC) |              |
|----|--------------|-----------------------------|--------------|
|    |              | TT+<br>MBC                  | ACPA+<br>MBC |
| 1  | RL29         | 0,94                        | 1,08         |
| 2  | RL44         | 1,11                        | 1,18         |
| 3  | RL45         | 0,89                        | 0,94         |
| 4  | RL47         | 0,90                        | 1,15         |
| 5  | RL48         | 0,94                        | 1,11         |
| 6  | RL49         | 0,96                        | 1,03         |
| 7  | RL50         | 1,03                        | 1,03         |
| 8  | RL51         | 1,06                        | 1,05         |
| 9  | RL52         | 1,00                        | 1,10         |

| No | Patient code | CD19<br>(MFI) |            |              | HLA-DR<br>(MFI) |            |              |
|----|--------------|---------------|------------|--------------|-----------------|------------|--------------|
|    |              | ACPA-<br>MBC  | TT+<br>MBC | ACPA+<br>MBC | ACPA-<br>MBC    | TT+<br>MBC | ACPA+<br>MBC |
| 1  | RL17         | 380           | 432        |              |                 |            |              |
| 2  | RL18         | 339           | 438        | 714          | 342             | 358        | 1748         |
| 3  | RL19         | 417           | 483        | 556          | 352             | 463        | 662          |
| 4  | RL20         | 385           | 311        | 482          | 268             | 321        | 449          |
| 5  | RL21         | 371           | 402        | 585          | 219             | 230        | 366          |
| 6  | RL23         | 600           | 438        | 789          | 527             | 681        | 1333         |
| 7  | RL24         | 497           | 442        | 818          | 376             | 317        | 358          |
| 8  | RL25         | 490           | 478        | 1095         | 644             | 666        | 720          |
| 9  | RL26         | 508           | 463        | 832          | 814             | 596        | 1209         |
| 10 | RL22         | 529           | 402        | 767          | nd              | nd         | nd           |
| 11 | RL29         | 526           | 629        | 811          | nd              | nd         | nd           |
| 12 | RL44         | 471           | 529        | 753          | nd              | nd         | nd           |
| 13 | RL45         | 413           | 466        | 588          | nd              | nd         | nd           |

nd = no data



**Figure 2B.**

| No | Patient code | CD80 (%) |         |           | CD86 (%) |         |           | Ki-67 (%) |         |           |
|----|--------------|----------|---------|-----------|----------|---------|-----------|-----------|---------|-----------|
|    |              | ACPA-MBC | TT+ MBC | ACPA+ MBC | ACPA-MBC | TT+ MBC | ACPA+ MBC | ACPA-MBC  | TT+ MBC | ACPA+ MBC |
| 1  | RL18         | 49,15    | 42,11   | 83,33     | 4,77     | 0,00    | 33,33     | 7,24      | 5,26    | 66,67     |
| 2  | RL19         | 53,52    | 69,35   | 97,73     | 1,76     | 1,61    | 22,73     | 14,65     | 0,00    | 36,36     |
| 3  | RL20         | 51,74    | 52,94   | 80,00     | 3,84     | 0,00    | 40,00     | 3,37      | 5,88    | 20,00     |
| 4  | RL21         | 59,24    | 68,33   | 92,39     | 5,09     | 0,00    | 10,87     | 7,58      | 0,00    | 11,96     |
| 5  | RL23         | 73,37    | 100,00  | 85,71     | 14,06    | 12,50   | 28,57     | 9,33      | 0,00    | 42,86     |
| 6  | RL24         | 59,93    | 61,62   | 97,56     | 2,15     | 0,54    | 3,25      | 5,67      | 2,16    | 35,77     |
| 7  | RL25         | 41,90    | 40,00   | 89,29     | 1,24     | 0,00    | 0,00      | 6,15      | 0,00    | 39,29     |
| 8  | RL26         | 43,01    | 60,76   | 83,33     | 2,27     | 1,27    | 0,00      | 6,28      | 2,53    | 16,67     |

**Figure 2C, Figure 3A (ACPA+ MBC, established RA), Fig. S4.**

| No | Patient code | CD19 (MFI ratio to bulk MBC) | HLA-DR (MFI ratio to bulk MBC) | CD80 (%) | CD86 (%) | Ki-67 (%) | DAS44 (3v) | Tender joint count | Swollen joint count | ESR (mm/1h) |
|----|--------------|------------------------------|--------------------------------|----------|----------|-----------|------------|--------------------|---------------------|-------------|
| 1  | RL5          | 1,45                         | 1,46                           | 100,00   | 37,50    | 62,50     | 1,16       | 0                  | 0                   | 17          |
| 2  | RL6          | 1,88                         | 0,71                           | 100,00   | 33,33    | 33,33     | 2,05       | 2                  | 2                   | 17          |
| 3  | RL7          | 1,87                         | 1,40                           | 93,55    | 16,13    | 19,35     | nd         | nd                 | nd                  | 2           |
| 4  | RL8          | 2,26                         | 1,92                           | 100,00   | 0,00     | 0,00      | 1,85       | 1                  | 1                   | 22          |
| 5  | RL9          | 1,73                         | 1,43                           | 100,00   | 0,00     | 0,00      | nd         | nd                 | nd                  | 28          |
| 6  | RL10         | 1,50                         | 1,28                           | 100,00   | 6,25     | 6,25      | 2,79       | 4                  | 6                   | 28          |
| 7  | RL11         | 1,49                         | 1,38                           | 100,00   | 5,56     | 16,67     | nd         | nd                 | nd                  | 17          |
| 8  | RL12         | 2,06                         | 0,95                           | 92,86    | 28,57    | 14,29     | nd         | nd                 | nd                  | 53          |
| 9  | RL13         | 1,54                         | 1,32                           | 100,00   | 4,76     | 2,38      | 3,8        | 12                 | 6                   | 55          |
| 10 | RL14         | 1,45                         | 1,37                           | 98,18    | 14,55    | 21,82     | 0,82       | 0                  | 0                   | 6           |
| 11 | RL15         | 1,37                         | 2,14                           | 95,12    | 0,00     | 53,66     | nd         | nd                 | nd                  | 6           |
| 12 | RL16         | 1,71                         | 1,36                           | 100,00   | 0,00     | 10,00     | 1,83       | 1                  | 0                   | 25          |
| 13 | RL18         | 2,11                         | 5,11                           | 83,33    | 33,33    | 66,67     | 3,74       | 13                 | 4                   | 53          |
| 14 | RL19         | 1,33                         | 1,88                           | 97,73    | 22,73    | 36,36     | nd         | nd                 | nd                  | 25          |
| 15 | RL20         | 1,25                         | 1,68                           | 80,00    | 40,00    | 20,00     | 0,82       | 0                  | 0                   | 6           |
| 16 | RL21         | 1,58                         | 1,67                           | 92,39    | 10,87    | 11,96     | 1,44       | 0                  | 1                   | 33          |
| 17 | RL23         | 1,32                         | 2,53                           | 85,71    | 28,57    | 42,86     | 1,42       | 0                  | 0                   | 38          |
| 18 | RL24         | 1,65                         | 0,95                           | 97,56    | 3,25     | 35,77     | 3,04       | 17                 | 0                   | 6           |
| 19 | RL25         | 2,23                         | 1,12                           | 89,29    | 0,00     | 39,29     | 1,86       | 2                  | 0                   | 14          |
| 20 | RL26         | 1,64                         | 1,49                           | 83,33    | 0,00     | 16,67     | nd         | nd                 | nd                  | 6           |

nd, no data

bulk MBC, ACPA-negative MBC

**Figure 3A.****ACPA+ MBC, arthralgia**

| No | Patient code | CD19<br>(MFI ratio to bulk MBC) | HLA-DR<br>(MFI ratio to bulk MBC) | CD80 (%) | CD86 (%) | Ki-67 (%) |
|----|--------------|---------------------------------|-----------------------------------|----------|----------|-----------|
| 1  | RL35         | 1,46                            | 1,36                              | 90,00    | 10,00    | 20,00     |
| 2  | RL36         | 1,14                            | 1,08                              | 83,33    | 0,00     | 11,11     |
| 3  | RL37         | 1,09                            | 1,34                              | 92,22    | 0,60     | 4,79      |
| 4  | RL38         | 1,46                            | 0,86                              | 75,00    | 0,00     | 25,00     |
| 5  | RL39         | 0,74                            | 0,91                              | 33,33    | 0,00     | 0,00      |
| 6  | RL40         | 0,97                            | 1,08                              | 60,00    | 0,00     | 20,00     |
| 7  | RL42         | 1,11                            | 2,24                              | 57,14    | 14,29    | 42,86     |
| 8  | RL43         | 1,49                            | 0,60                              | 60,00    | 0,00     | 60,00     |

bulk MBC, ACPA-negative MBC

**ACPA+ MBC, recent onset RA**

| No | Patient code | CD19<br>(MFI ratio to bulk MBC) | HLA-DR<br>(MFI ratio to bulk MBC) | CD80 (%) | CD86 (%) | Ki-67 (%) |
|----|--------------|---------------------------------|-----------------------------------|----------|----------|-----------|
| 1  | RL62         | 1,49                            | 2,41                              | 100      | 44,44    | 66,67     |
| 2  | RL64         | 1,86                            | 1,58                              | 95,85    | 12,50    | 56,25     |
| 3  | RL65         | 1,40                            | 2,32                              | 100      | 0        | 33,33     |
| 4  | RL67         | 1,98                            | 2,17                              | 100      | 10,53    | 31,58     |
| 5  | RL68         | 1,87                            | 2,07                              | 94,74    | 21,05    | 52,63     |
| 6  | RL69         | 1,89                            | 1,72                              | 83,33    | 12,5     | 41,67     |
| 7  | RL71         | 1,36                            | 3,17                              | 100      | 50       | 70        |

bulk MBC, ACPA-negative MBC

**Figure 3B.****TT+ MBC, steady state**

| No | Patient code | CD19<br>(MFI ratio to bulk MBC) | HLA-DR<br>(MFI ratio to bulk MBC) | CD80 (%) | CD86 (%) | Ki-67 (%) |
|----|--------------|---------------------------------|-----------------------------------|----------|----------|-----------|
| 1  | RL17         | 1,14                            | 1,02                              | 45,45    | 3,6      | 0         |
| 2  | RL18         | 1,29                            | 1,05                              | 42,11    | 0,00     | 5,26      |
| 3  | RL19         | 1,16                            | 1,32                              | 69,35    | 1,61     | 0,00      |
| 4  | RL20         | 0,81                            | 1,20                              | 52,94    | 0,00     | 5,88      |
| 5  | RL21         | 1,08                            | 1,05                              | 68,33    | 0,00     | 0,00      |
| 6  | RL23         | 0,73                            | 1,29                              | 100,00   | 12,50    | 0,00      |
| 7  | RL24         | 0,89                            | 0,84                              | 61,62    | 0,54     | 2,16      |
| 8  | RL25         | 0,98                            | 1,03                              | 40,00    | 0,00     | 0,00      |
| 9  | RL26         | 0,91                            | 0,73                              | 60,76    | 1,27     | 2,53      |
| 10 | RL22         | 0,76                            | nd                                | nd       | nd       | nd        |
| 11 | RL29         | 1,20                            | nd                                | nd       | nd       | nd        |
| 12 | RL44         | 1,12                            | nd                                | nd       | nd       | nd        |
| 13 | RL45         | 1,13                            | nd                                | nd       | nd       | nd        |

nd = no data

bulk MBC, ACPA-negative MBC

**TT+MBC, Recently vaccinated**

| No | Patient code | CD19<br>(MFI ratio to bulk MBC) | HLA-DR<br>(MFI ratio to bulk MBC) | CD80 (%) | CD86 (%) | Ki-67 (%) |
|----|--------------|---------------------------------|-----------------------------------|----------|----------|-----------|
| 1  | RL60         | 1,41                            | 0,83                              | 86,67    | 6,67     | 20,00     |
| 2  | RL61         | 1,43                            | 1,44                              | 100,00   | 9,52     | 38,10     |
| 3  | RL62         | 1,17                            | 1,53                              | 95,37    | 0,00     | 8,33      |
| 4  | RL63         | 1,05                            | 1,39                              | 88,89    | 0,00     | 22,22     |
| 5  | RL65         | 1,43                            | 1,78                              | 96,34    | 2,20     | 68,54     |
| 6  | RL66         | 1,06                            | 1,27                              | 86,96    | 4,35     | 15,22     |
| 7  | RL69         | 1,37                            | 1,46                              | 63,64    | 13,64    | 43,94     |
| 8  | RL70         | 1,79                            | 3,51                              | 99,41    | 8,70     | 32,46     |

bulk MBC, ACPA-negative MBC

**Figure 3C and Fig. S7.**

| No | Patient code | Days after booster tetanus vaccination | CD19<br>(MFI ratio to bulk MBC) | HLA-DR<br>(MFI ratio to bulk MBC) | CD80 (%) | CD86 (%) | Ki-67 (%) |
|----|--------------|----------------------------------------|---------------------------------|-----------------------------------|----------|----------|-----------|
| 1  | RL65         | 14                                     | 1,43                            | 1,78                              | 96,34    | 2,2      | 68,54     |
| 2  | RL70         | 14                                     | 1,79                            | 3,51                              | 99,41    | 8,7      | 32,46     |
| 3  | RL69         | 18                                     | 1,37                            | 1,46                              | 63,64    | 13,64    | 43,94     |
| 4  | RL61         | 19                                     | 1,43                            | 1,44                              | 100      | 9,52     | 38,1      |
| 5  | RL66         | 19                                     | 1,06                            | 1,27                              | 86,96    | 4,35     | 15,22     |
| 6  | RL62         | 21                                     | 1,17                            | 1,53                              | 95,37    | 0        | 8,33      |
| 7  | RL60         | 27                                     | 1,41                            | 0,83                              | 86,67    | 6,67     | 20        |
| 8  | RL63         | 27                                     | 1,05                            | 1,39                              | 88,89    | 0        | 22,22     |
| 9  | RL68         | 35                                     | 1,45                            | 1,29                              | 50       | 3,65     | 4,17      |
| 10 | RL67         | 36                                     | 1,06                            | 0,93                              | 55,93    | 1,03     | 1,8       |
| 11 | RL64         | 42                                     | 1,09                            | 1,27                              | 85,38    | 1,75     | 6,43      |

bulk MBC, ACPA-negative MBC

**Figure 4A.**

| No | Patient code | ACPA- MBC (in MFI) | TT+ MBC (in MFI) | ACPA+ MBC (in MFI) |
|----|--------------|--------------------|------------------|--------------------|
| 1  | RL44         | 1094               | 1424             | 1056               |
| 2  | RL47         | 1619               | 1660             | 844                |
| 3  | RL48         | 1317               | 1961             | 5                  |
| 4  | RL49         | 1674               | 2109             | 107                |
| 5  | RL50         | 1977               | 925              | 499                |
| 6  | RL51         | 1227               | 1817             | 227                |
| 7  | RL52         | 1713               | 3112             | 518                |

**Figure 4B.**

| No | Patient code | ACPA- MBC (in MFI) | ACPA+ MBC (in MFI) |
|----|--------------|--------------------|--------------------|
| 1  | RL56         | 159                | 82                 |
| 2  | RL57         | 132                | 8                  |
| 3  | RL58         | 107                | -64                |
| 4  | RL59         | 59                 | 15                 |

**Figure 5A.**

| No | Patient code | ACPA- MBC |      |      | ACPA+ MBC |      |      |
|----|--------------|-----------|------|------|-----------|------|------|
|    |              | IL-8      | IL-6 | TNFa | IL-8      | IL-6 | TNFa |
| 1  | RL31         | 0,25      | 0,03 | 0,12 | 1,63      | 0,03 | 0,12 |
| 2  | RL32         | 0,87      | 0,10 | 0,22 | 11,81     | 0,46 | 0,40 |
| 3  | RL33         | 0,13      | 0,01 | 0,05 | 108,78    | 1,36 | 0,43 |
| 4  | RL34         | 0,66      | 0,01 | 0,21 | 239,73    | 2,75 | 1,43 |
| 5  | RL41         | 0,06      | 0,00 | 0,04 | 51,59     | 0,58 | 0,58 |

Cytokine concentrations in pg/ml.

**Figure 5B.**

| No | Patient code | ACPA- B cells |      |      | ACPA+ B cells |      |      |
|----|--------------|---------------|------|------|---------------|------|------|
|    |              | IL-8          | IL-6 | TNFa | IL-8          | IL-6 | TNFa |
| 1  | RL46         | 85            | 3    | 7    | 225           | 14   | 5    |
| 2  | RL53         | 174           | 14   | 7    | 1140          | 57   | 220  |
| 3  | RL54         | 60            | 3    | 18   | 87            | 388  | 128  |
| 4  | RL55         | 25            | -2   | 7    | 79            | -13  | 46   |

Values presented as delta MFI

**Figure 5C.****ACPA-positive B cell clone**

| Well number | Fib  | cit-Fib | Vin  | cit-Vin | MBP  | cit-MBP |
|-------------|------|---------|------|---------|------|---------|
| 1           | 2,34 | 10,25   | 2,44 | 8,26    | 2,93 | 160,16  |
| 2           | 2,83 | 6,87    | 4,31 | 8,16    | 3,23 | 149,82  |
| 3           | 3,52 | 8,85    | 5,98 | 10,25   | 4,01 | 148,88  |

Concentrations presented in pg/ml.

**Figure 5D.**

| Well number | TT+ clone | ACPA+ clone |
|-------------|-----------|-------------|
| 1           | 28,84     | 847,13      |
| 2           | 27,66     | 779,44      |
| 3           | 29,60     | 865,43      |

**Figure 5E.**

| Well number | Medium only | 100ng/ml IL-8 | IL-8 + Anti-IL-8 Ab | ACPA+ supernatant | ACPA+ supernatant + Anti-IL-8 Ab | Tetanus supernatant | Tetanus supernatant + Anti-IL-8 Ab |
|-------------|-------------|---------------|---------------------|-------------------|----------------------------------|---------------------|------------------------------------|
| 1           | 61187       | 172278        | 95183               | 102504            | 55395                            | 65341               | 59419                              |
| 2           | 67711       | 178138        | 84913               | 103369            | 72969                            | 80545               | 63041                              |
| 3           |             |               |                     | 101998            | 68238                            | 70022               | 57808                              |

**Figure S5B.**

| No | Arthralgia   |                            |                            | Established RA |                            |                            |
|----|--------------|----------------------------|----------------------------|----------------|----------------------------|----------------------------|
|    | Patient code | ACPA concentration (AU/ml) | ACPA+ B cell frequency (%) | Patient code   | ACPA concentration (AU/ml) | ACPA+ B cell frequency (%) |
| 1  | RL35         | 2563                       | 0,0046                     | RL23           | 2671                       | 0,0029                     |
| 2  | RL36         | 1597                       | 0,0042                     | RL10           | 1279                       | 0,0045                     |
| 3  | RL37         | 272                        | 0,0388                     | RL15           | 222                        | 0,0087                     |
| 4  | RL38         | 1701                       | 0,0014                     | RL26           | 1297                       | 0,0013                     |
| 5  | RL40         | 569                        | 0,0019                     | RL9            | 765                        | 0,0021                     |
| 6  | RL43         | 31                         | 0,0016                     | RL5            | 101                        | 0,0021                     |

**Figure S5C.**

| No | Patient code | ACPA+ B cell frequency (in %) | ACPA IgG serum concentration (AU/ml) |
|----|--------------|-------------------------------|--------------------------------------|
| 1  | RL35         | 0,0046                        | 2563                                 |
| 2  | RL36         | 0,0042                        | 1597                                 |
| 3  | RL37         | 0,0388                        | 272                                  |
| 4  | RL38         | 0,0014                        | 1701                                 |
| 5  | RL39         | 0,0008                        | 14                                   |
| 6  | RL40         | 0,0019                        | 569                                  |
| 7  | RL42         | 0,0008                        | 19                                   |
| 8  | RL43         | 0,0016                        | 31                                   |

**Figure S5D.****ACPA+ B cells, arthralgia**

| No | Patient code | CD20+ CD27- frequency (in %) | CD20+ CD27+ frequency (in %) | CD20- CD27++ frequency (in %) |
|----|--------------|------------------------------|------------------------------|-------------------------------|
| 1  | RL35         | 17                           | 83                           | 0                             |
| 2  | RL36         | 10                           | 86                           | 0                             |
| 3  | RL37         | 15                           | 84                           | 1                             |
| 4  | RL38         | 20                           | 80                           | 0                             |
| 5  | RL39         | 63                           | 38                           | 0                             |
| 6  | RL40         | 38                           | 63                           | 0                             |
| 7  | RL42         | 22                           | 78                           | 0                             |
| 8  | RL43         | 17                           | 83                           | 0                             |

**ACPA+ B cells, recent onset RA**

| No | Patient code | CD20+ CD27- frequency (in %) | CD20+ CD27+ frequency (in %) | CD20- CD27++ frequency (in %) |
|----|--------------|------------------------------|------------------------------|-------------------------------|
| 1  | RL62         | 29                           | 53                           | 0                             |
| 2  | RL64         | 4                            | 48                           | 44                            |
| 3  | RL65         | 44                           | 50                           | 1                             |
| 4  | RL67         | 17                           | 79                           | 0                             |
| 5  | RL68         | 41                           | 56                           | 0                             |
| 6  | RL69         | 8                            | 47                           | 35                            |
| 7  | RL71         | 14                           | 48                           | 24                            |

**ACPA+ B cells, established RA**

| No | Patient code | CD20+ CD27- frequency (in %) | CD20+ CD27+ frequency (in %) | CD20- CD27++ frequency (in %) |
|----|--------------|------------------------------|------------------------------|-------------------------------|
| 1  | RL5          | 47                           | 42                           | 11                            |
| 2  | RL6          | 22                           | 67                           | 11                            |
| 3  | RL7          | 16                           | 84                           | 0                             |
| 4  | RL8          | 63                           | 38                           | 0                             |
| 5  | RL9          | 56                           | 44                           | 0                             |
| 6  | RL10         | 11                           | 84                           | 5                             |
| 7  | RL11         | 43                           | 49                           | 8                             |
| 8  | RL12         | 38                           | 58                           | 4                             |
| 9  | RL13         | 19                           | 81                           | 0                             |
| 10 | RL14         | 32                           | 65                           | 2                             |
| 11 | RL15         | 12                           | 82                           | 6                             |
| 12 | RL16         | 19                           | 48                           | 33                            |
| 13 | RL18         | 10                           | 60                           | 30                            |
| 14 | RL19         | 36                           | 64                           | 0                             |
| 15 | RL20         | 50                           | 50                           | 0                             |
| 16 | RL21         | 32                           | 67                           | 1                             |
| 17 | RL23         | 47                           | 47                           | 7                             |
| 18 | RL24         | 13                           | 75                           | 12                            |
| 19 | RL25         | 15                           | 85                           | 0                             |
| 20 | RL26         | 33                           | 67                           | 0                             |

**Figure S9.**

| No | Patient code | ACPA- MBC (in MFI) | ACPA+ MBC (in MFI) |
|----|--------------|--------------------|--------------------|
| 1  | RL1          | 7950               | 3107               |
| 2  | RL2          | 7573               | 5741               |
| 3  | RL3          | 930                | 624                |
| 4  | RL4          | 12382              | 3414               |
| 5  | RL27         | 2975               | 2402               |
| 6  | RL28         | 4905               | 1442               |
| 7  | RL29         | 3828               | 3360               |
| 8  | RL30         | 2288               | 725                |

**Figure S10.**

**TT-specific B cell clone**

| Well number | Fib  | cit-Fib | Vin   | cit-Vin | MBP  | cit-MBP |
|-------------|------|---------|-------|---------|------|---------|
| 1           | 6,67 | 6,77    | 11,24 | 9,75    | 9,35 | 10,15   |
| 2           | 8,46 | 6,67    | 7,57  | 14,95   | 9,85 | 9,95    |
| 3           | 9,05 | 5,88    | 12,44 | 12,34   | 9,45 | 12,14   |

Concentrations presented in pg/ml.
